# Supplementary material
Source: publisher figshare collection journal article supplement (https://tandf.figshare.com/ndownloader/files/24458422)
Supplement: Supplementary file 1 [file 24458422]

Appendices / Supplementary material

### Appendix 1

Questionnaire used for the interviews with former forestry cooks

In Swedish and translated to English in brackets []

Namn: [Name]

Ålder: [Age]

Adress: [Address]

Geografi/tidsperiod [Geography/time period]

När jobbade du som kocka? [When did you work as a cook?]

Hur gammal var du då? [How old were you then?]

Hur länge/många vintrar jobbade du? [For how long/how many winters did you work?]

Var i landet jobbade du? (vilken är närmsta ort/by) [Where in the country did you work (nearest community/village?)]

Hur fick du jobbet? [How did you get the job?]

Vem anställde dig? /betalade din lön? [Who employed you? /paid your salary?]

Arbetsplatsen [The workplace]

Hur många huggare/körare lagade du mat för? [How many forest workers did you cook for?]

Hur såg skogsarbetarkojan/-arbetsbostaden ut? [What did the forest camp/workplace look like?]

Hur bodde du där? Eget rum? [How did you live there? Did you have your own room?]

Fanns det fler byggnader? [Were there other buildings?]

Hur långt var det till närmsta by/ annan skogsarbetarkoja? [How far was it from the nearest village or neighboring forest camp?]

Hur skulle du beskriva arbetssituationen? [How would you describe the work situation?]

Behövde kockan ha auktoritet bland skogsarbetarna? [Did the cook need to have authority among the forest workers?]

Vilken var din roll i arbetslaget? [What was your role in the team?]

Var det svårt att vara (yngre?) kvinna i en mansdominerad värld? [Was it difficult to be a (younger?) woman in a male-dominated world?]

Hade du någon fritid? [Did you have any free time?]

Vad sysselsatte du dig med då? [What did you do then?]

Kunde du åka iväg? [Could you leave temporarily?]

Kockans arbete [the cook’s job]

Vilka var dina arbetsuppgifter? (fråga gärna för att få en så exakt uppräkning som möjligt, kanske utifrån dygnets timmar. Vad hände när du först steg upp på morgonen…osv) [What were your tasks? (preferably ask in order to get a detailed account, maybe based on the hours of the day)]

Arbetstider? [Work-hours?]

Hur mycket tjänande du (hur var detta i förhållande till andra typiskt kvinnliga jobb för tiden?/ i förhållande till skogshuggarna/körarnas lön?) [How much money did you make? (How did these sums compare to other jobs typical for women at the time? And in relation to the loggers/drivers?)]

Hade du någon utbildning (formell eller informell)? [Did you have any education (formal or informal?)]

Maten [The food]

Vad lagade du för mat? [What did you cook?]

Hur många mål om dagen? [How many meals a day?]

Var det stor variation? [Was there great variation?]

Vilka var de populäraste rätterna? [Which were the most popular dishes?]

Vad åt skogsarbetarna innan du kom till kojan? [What did the forest workers eat before you came to the forest camp?]

Vem bestämde vad som skulle lagas? [Who decided what to cook?]

Hur sköttes inköp? [How were purchases made?]

Vem lade ut pengar för råvarorna? [Who paid for the ingredients?]

Var lagades maten? Över öppen eld/vedspis/annat? [Where was the food cooked? Over an open fire/stove/something else?]

Vad hade du för köksredskap/grytor och kastruller? [What type of equipment did you have to facilitate cooking and serving food?]

Hygien [Hygiene]

Hade du ansvar även för städning? [Was cleaning your responsibility?]

Tvättning? [Laundry?]

Hur sköttes det? [How was that done?]

Var det svårt att hålla rent? [Was it hard to keep the place clean?]

Var hämtades vatten?/ved? Och av vem? [From where was water fetched and firewood collected? And by whom?]

Vad hade du för städredskap? [What type of cleaning equipment did you have?]

Synen på kockorna i samhället [How the cooks were viewed in society]

Vad tyckte dina föräldrar om att du tog jobb som kocka? [What did your parents think of the fact that you took the job as a cook?]

Var det vanligt bland dina jämnåriga kvinnliga kompisar, släktingar att ta arbete som kocka? [Was it common among women **of** your age (your friends, relatives) to work as cooks?]

Hur ansågs kocka yrket (av andra/samhället/vänner?) [How was the cook job viewed (by others/in society/friends?)]

Vilken ställning hade du i arbetslaget? (bland männen?) [What status/position did you have in the work team? (among the men?)]

Känner du till några manliga kockor? [Do you know of any male cooks?]

Tidigare erfarenheter/ koppling till skogen/ utbildning [Previous experience/connection to the forest/education]

Vad hade du för tidigare relation/erfarenhet av skogen/skogsarbete? [What was your previous relationship to the forest/forest work?]

Hade du hjälpt till att [Had you ever…]

Hugga ved? [Chopped firewood?]

Barka? [Barked timber?]

Röja? [Undertaken pre-commercial thinning?]

Plantera? [Planted seedlings?]

Besprutat med hormoslyr? [Undertaken herbicide treatment of deciduous trees in clearcuts?]

Kvistat? [Delimbed cut timber?]

Kapat? [Cut timber?]

Kört häst? [Worked with horses to transport timber?]

Brosslat? [Moved timber using sledges?]

Känner du till andra kvinnor som har arbetat i skogen förutom som kockor? [Do you know about other women working in the forest doing something else other than cooking?]

Arbetsmoral [Work ethic]

Vilka personliga egenskaper värdesattes i arbetet? [What personal characteristics were valued in this job?]

Vilka egenskaper såg man ner på? [What characteristics were looked down upon?]

Avslutande frågor [Concluding questions]

Vad var det som var roligast/ jobbigast/svårast/hårdast med arbetet som kocka? [What were the most enjoyable and the most difficult aspects of being a cook?]

Hade du valt att göra det igen, om du hade fått välja? [Would you do it again if you could?]

Hur påverkade tiden som kocka ditt liv efteråt? [How did your time as a cook affect your life afterwards?]

Vilka lärdommar fick du? [What did you learn from it?]

Vilka färdigheter? [Which skills did you acquire from it?]

Känner du till någon idag levande kocka som vi skulle kunna intervjua [Do you know of any other former cooks alive today who we can interview?]

Appendix 2

Original quotes (in Swedish)
1. “Kronjägarn som var i Örträsk, han som hade hand om avverkningen, han bara kom in till oss och funderade på om inte jag skulle kunna fara iväg och vara kocka”.
2. “Pappa och mina bröder var ju där, så det var väl han som tog dit mig, och lejde mig”.
3. “Kocklönen den minns jag inte, men jag vet att jag tyckte att jag var rik, för jag hade ju aldrig haft några pengar. Men jag hade ju egentligen inte så mycket”.
4. “Hon gjorde det utan att fråga först också, dessutom, men jag tog det väl som ett förtroende också, jag tänkte hon måste ju tro på mig”.
5. “Jag tog mitt pick och pack och skulle fara tillbaka”.
6. ”Om jag inte gjorde rätt för mig, då hade de nog skämts i byn”.
7. “Det var väl ingen som behövde nån kocka”.
8. “Jag vet inte om jag var intresserad av det heller”.
9. “Då jag växte upp så fick man ju hjälpa till mycket mer än vad dagens ungdomar, och vad mina egna döttrar också har gjort”.
10. “Där lärde man sig en hel del, och det var jättebra”.
11. “Jag hade inte den blekaste aning vad det handlade om”.
12. “Vi var kraftiga och stabila kvinnor. Du fick inte vara klen utan du fick ha ett visst mått och styrka”.
13. “Jag var för blyg, och det var inte heller brukligt”.
14. ”Det är det absolut jobbigaste jobb jag nånsin har haft, kan jag säga”
15. ”Det var som en familj. Ingen mobbning som det kan vara nu. Aldrig”.
16. ”Det var ingen som var högre än nån annan.”
17. ”Det var fritt. Jag kunde göra vad jag ville då dem inte var där, jag kunde lägga mig då dem for till skogen. Och sen måste jag ju städa och diska och sådär också”.
18. “Jag kände mig inte som nån slav”.
19. “Karlarna var hyggliga, man behövde aldrig gå och vara rädd inte. Nu för tiden så törs väl inte en kvinna vara i lag med femton, tjugo karlar tror jag, för karlarna har ju blivit tokiga”.
20. “Men är du klok jänta?, sa min morbror, vi ska ju spela kort först!, så det gick inte”.
21. “Är du färdig snart?”.
22. “Jag ville inte vistas inne i den där sovsalen, för du kan inte föreställa dig vilken doft det var där”.
23. “Så jag hade ju faktiskt nästan ingenting för dessa sju månader”.
24. ”Farmor lärde mig, spela aldrig kort”.
25. “Där höll vi nästan på att få svälta ihjäl”.
